# Supplementary material
Source: PubMed Central journal article supplement (PMC5148153)
Supplement: NIHMS799259-supplement-supplemental_information.pdf [file NIHMS799259-supplement-supplemental_information.pdf]

Number of pages: 2

Number of figures: 1

Number of tables: 1

## **Supporting Information**

### **Nitinol-based Nanotubular Arrays with Controlled Diameters Upregulate Human Vascular Cell ECM Production**

*Phin P. Lee,<sup>1,2</sup> Tejal A. Desai\*<sup>1,2</sup>*

<sup>1</sup> Department of Bioengineering and Therapeutic Sciences, University of California – San Francisco, San Francisco, California 94158, United States

<sup>2</sup> The UC Berkeley – UCSF Graduate Group in Bioengineering, University of California – San Francisco, San Francisco, California 94158, United States

| Relative Cell Numbers (Day 7 / Day 1) |                 |                 |               |
|---------------------------------------|-----------------|-----------------|---------------|
|                                       | 110             | 70              | Control       |
| HAEC                                  | $2.7 \pm 0.5^*$ | $2.7 \pm 0.6^*$ | $6.7 \pm 0.2$ |
| HASMC                                 | $7.5 \pm 0.2^+$ | $6.0 \pm 0.5$   | $7.5 \pm 0.4$ |

**Table S1.** Relative cell numbers (Day 7 / Day 1) for HAEC and HASMC on 110, 70 and Control. One-way ANOVA for HAEC ( $F(2,6) = 22.735$ ,  $p = 0.002$ ).  $N = 3$ . When comparing the HAEC relative cell numbers between 110 and Control, and 70 and Control,  $* = p < 0.05$ . One-way ANOVA for HASMC ( $F(2,12) = 4.567$ ,  $p = 0.034$ ).  $N = 5$ . When comparing the HASMC relative cell numbers between 110 and 70,  $+ = p < 0.05$ .

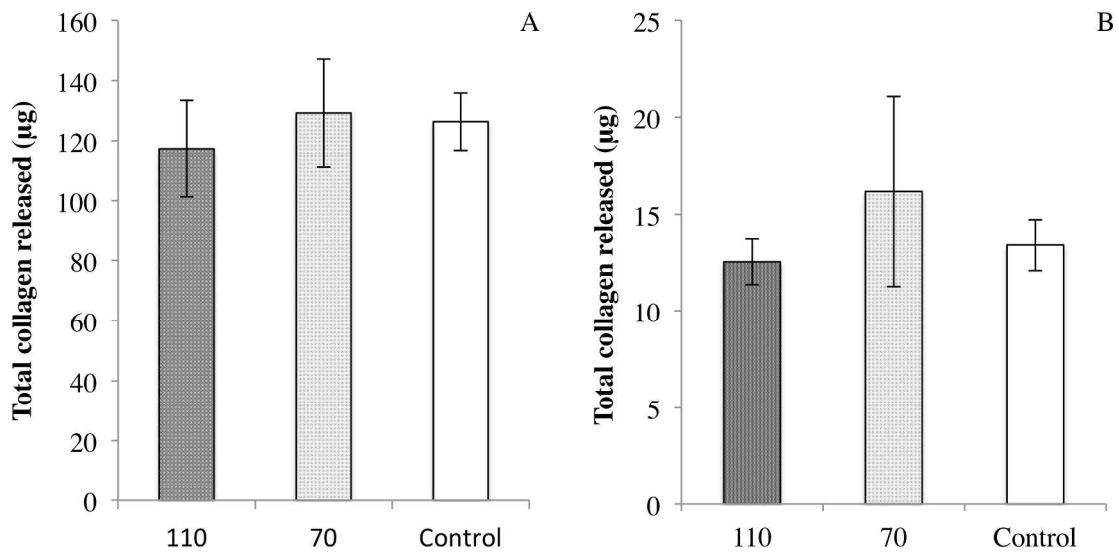

**Figure S1.** Total collagen released per 1 cm x 1 cm substrate by HAEC (A) and HASMC (B).
